# Supplementary material for: Biological Activity of Optimized Codon Bovine Type III Interferon Expressed in Pichia Pastoris
Source: Preprints.org preprint supplement (doi:10.20944/preprints202304.0454.v1), 2023-04-17
Supplement: Supplementary file 3 [file supplementary]

**Supplement Figure legends**


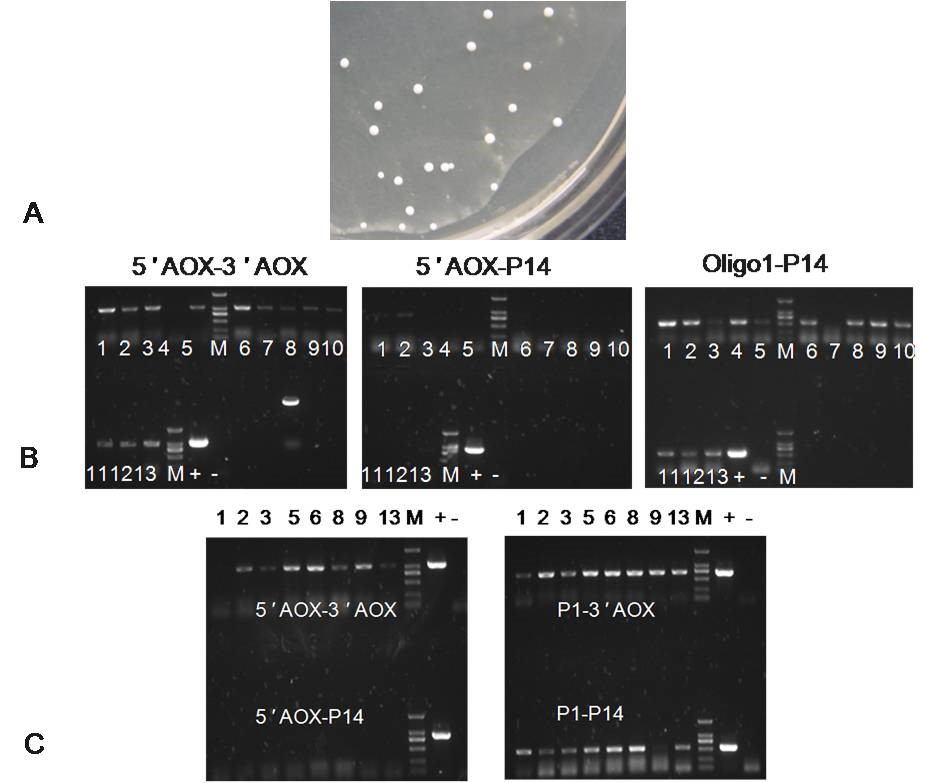


**Figure. S1.** The selection and identification of recombinant GS115-pPICZαA-boIFN-λ3

(A). The colony of the GS115-pPICZαA-boIFN-λ3. (B). PCR product amplified from the first generation of GS115-pPICZαA-boIFN-λ3 1to13; + Positive control; - Negative control. (C). PCR identified from the second generation of GS115-pPICZαA-boIFN-λ3 1, 2, 3, 5, 6, 8, 9 and 13; + Positive control; - Negative control.


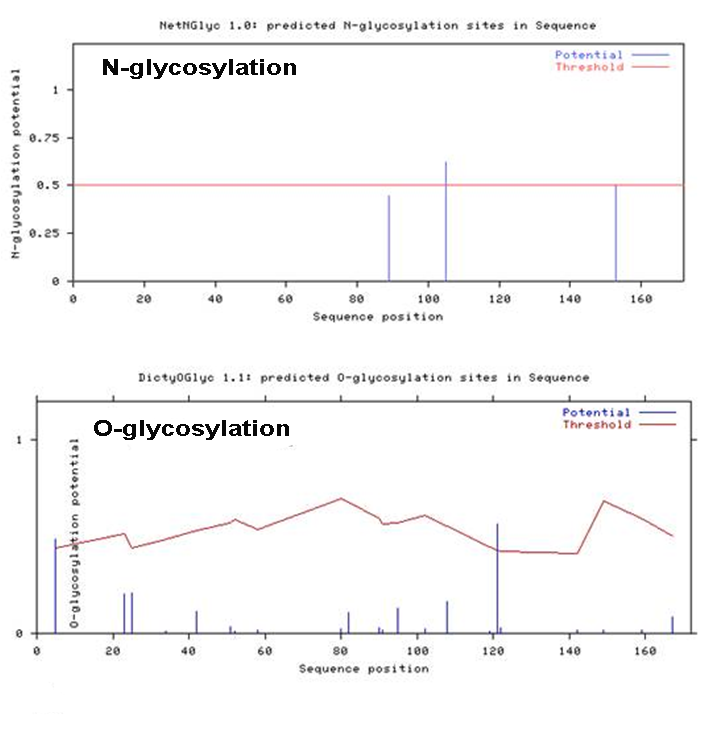


**Figure. S2**. The predicted N-linked and O-linked glycosylation sequence of boIFN-λ3


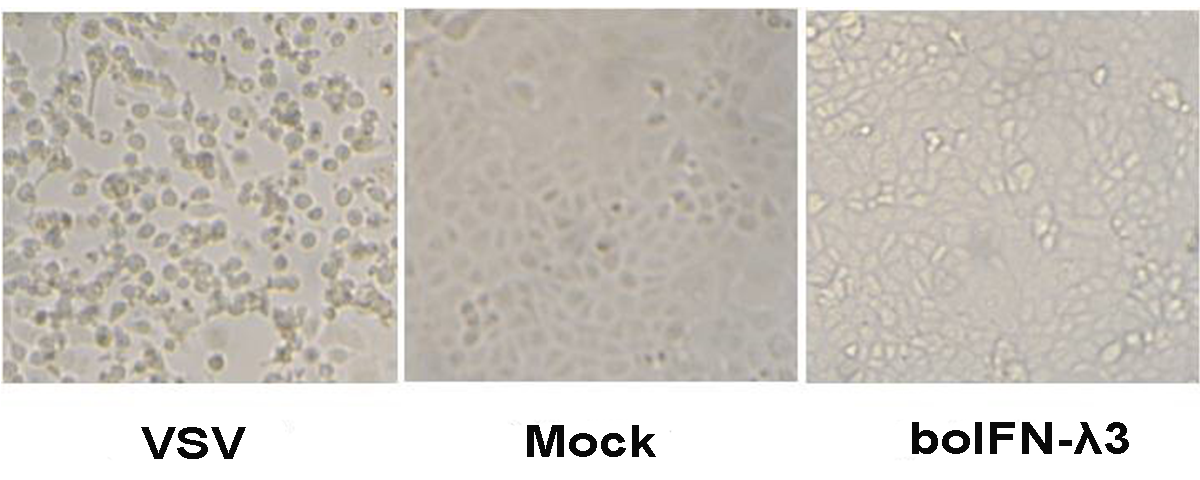


**Figure. S3.** Inhibation of VSV in MDBK cell by recombinant boIFN-λ3
